# Supplementary material
Source: publisher figshare collection journal article supplement (https://frontiersin.figshare.com/ndownloader/files/29169381)
Supplement: Supplementary file 1 [file 29169381]

**Production of Biodiesel from *Croton gratissimus* Oil using Sulphated Zirconia and KOH as Catalysts**

**Phiwe Charles Jiyane1, Kaniki Tumba1,*, Paul Musonge2**

*1Thermodynamics-Materials-Separations Research Group (TMSRG), Department of Chemical Engineering, Mangosuthu University of Technology, uMlazi, Durban, 4031, South Africa.*

*2Faculty of Engineering, Mangosuthu University of Technology, uMlazi, Durban, 4031, South Africa.*

*** Correspondence:** Corresponding Author - [tumba@mut.ac.za](mailto:tumba@mut.ac.za)

**Supplemental Materials**


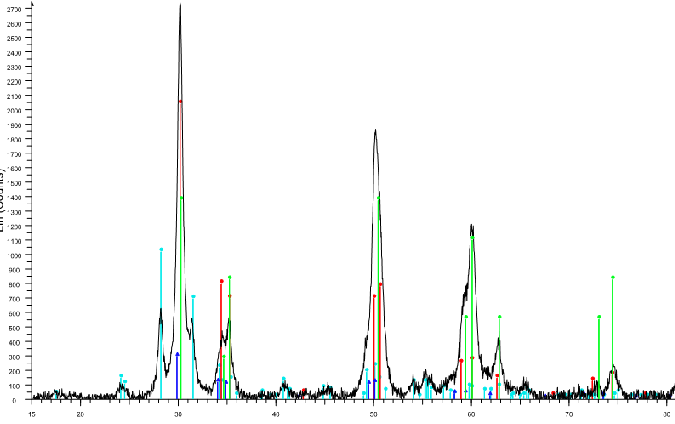


2700

2400

2100

1800

1500

1200

900

600

300

0

Lin (Counts)

**M**

**M**

**T**

**M**

**T**

**T**

**T**

**M**

**M**

**M**

**T**

**M**

**M**

**T**

**T**

**M**

**Fig. S1:** X-ray diffraction profiles of the SO42–/ZrO2 catalyst calcined at 620 0C. **M** – Monoclinic Phase – **Powder Blue;** Orthorhombic Phase – **Light Green**; **T** – Tetragonal Phase – **Red**  (No match to the reference pattern)


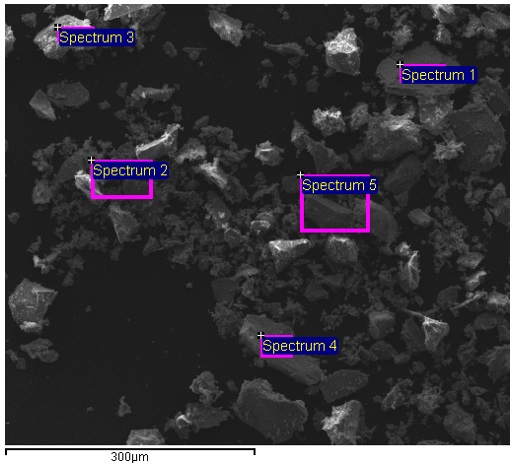


**Fig. S2:** SEM micrograph of SO42–/ZrO2 catalyst calcined at 6200C


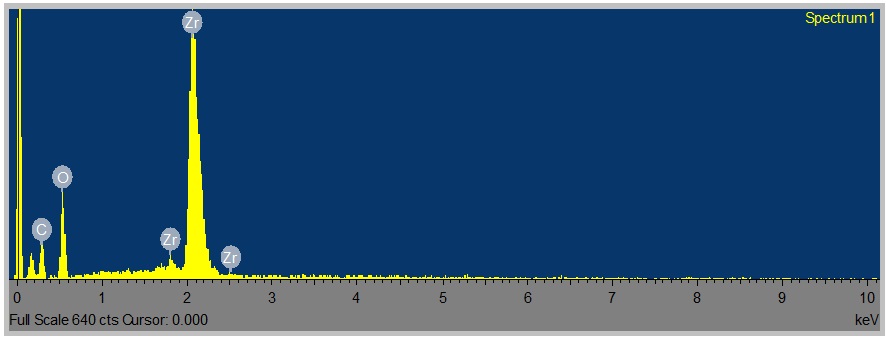


**Fig. S3:** SEM – EDS Spectra for the Elemental Composition of the SO42–/ZrO2 catalyst


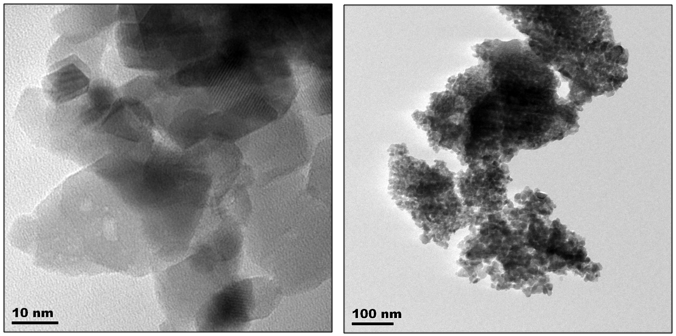


**Fig. S4:** TEM Micrographs of the Monoclinic SO42–/ZrO2 catalyst


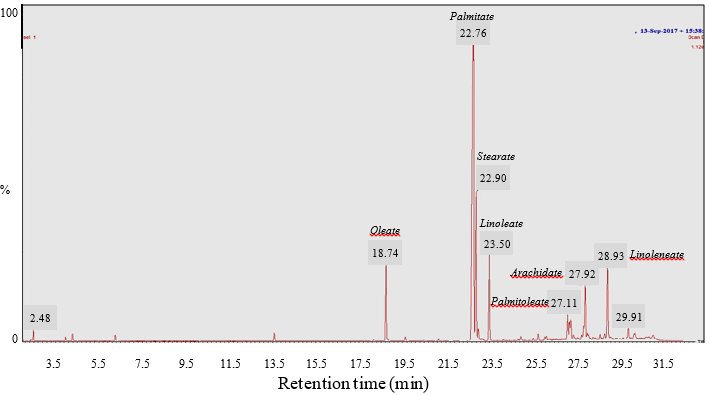


**Fig. S5:** GC-MS Spectrum for *Croton gratissimus* FAME
